# Supplementary material
Source: HighWire-hosted journal article supplement (http://www.jrheum.org/highwire/filestream/33724/field_highwire_adjunct_files/0/180142DataSuppl.pdf)
Supplement: 180142DataSuppl.pdf [file 180142DataSuppl.pdf]

**Supplementary Table 1.** Candidate instruments for the PsA core instrument set.

| 2016 PsA Core Outcome Set                                                                                                                | Candidate outcome measurement instruments                                                                                                                                                                                                                                                                                                                                                                                                                                                                                                                                                                                                                                                                                                                                                                                                                                                                                                                                                                                                                                                                                                                                                        |
|------------------------------------------------------------------------------------------------------------------------------------------|--------------------------------------------------------------------------------------------------------------------------------------------------------------------------------------------------------------------------------------------------------------------------------------------------------------------------------------------------------------------------------------------------------------------------------------------------------------------------------------------------------------------------------------------------------------------------------------------------------------------------------------------------------------------------------------------------------------------------------------------------------------------------------------------------------------------------------------------------------------------------------------------------------------------------------------------------------------------------------------------------------------------------------------------------------------------------------------------------------------------------------------------------------------------------------------------------|
| <b>MSK disease activity: presence of disease (signs and) symptoms, includes peripheral joints, enthesitis, dactylitis, and the spine</b> |                                                                                                                                                                                                                                                                                                                                                                                                                                                                                                                                                                                                                                                                                                                                                                                                                                                                                                                                                                                                                                                                                                                                                                                                  |
| <b>MSK disease activity/Arthritis</b>                                                                                                    | <p><b><u>Physician assessed with patient input (tenderness)</u></b><br/> SJC/TJC (76/78) – includes feet<br/> SJC/TJC (66/68) – includes feet<br/> SJC/TJC (44/46) – includes feet</p> <p><b><u>The patient completes a questionnaire. Patient reported (PROMs)</u></b><br/> PASE questionnaire<br/> RADAI Self-Report Joint Count<br/> PEST questionnaire<br/> Stockerau Activity Score for Psoriatic Arthritis (SASPA)- German version only</p> <p><b><u>Arthritis-synovitis assessed using ultrasound</u></b><br/> Ultrasound Synovitis (Y/N) – Tools are in development<br/> Contrast-Enhanced Ultrasound (CEUS) – Tools are in development<br/> Ultrasound joints (synovitis, erosion, joint space narrowing, power doppler) – Tools are in development</p> <p><b><u>Arthritis-synovitis assessed using MRI: the patient undergoes an MRI of both hands and feet. A trained musculoskeletal radiologist performs the score by looking at the MRI images</u></b><br/> OMERACT PsA Magnetic Resonance Imaging Scoring (PsAMRIS): assesses <b>hands and feet</b> joints synovitis, bone marrow edema, and bone erosion + tenosynovitis, periarticular inflammation, and bone proliferation</p> |
| <b>MSK disease activity/Dactylitis</b>                                                                                                   | <p><b><u>Physician assessed with patient input (tenderness)</u></b><br/> Dactylitis count x tenderness grading 0-3 (a la Ritchie, range 0-60)<br/> Dactylitis count (0-20)<br/> Leeds Dactylitis Index (LDI) - Leeds dactylometer, circumference ratio of fingers<br/> LDI basic - Leeds dactylometer</p> <p><b><u>Dactylitis assessment using ultrasound</u></b></p>                                                                                                                                                                                                                                                                                                                                                                                                                                                                                                                                                                                                                                                                                                                                                                                                                            |

|                                               |                                                                                                                                                                                                                                                                                                                                                                                                                                                                                                                                                                                                                                                                                                                                                                                                                                                                                                                              |
|-----------------------------------------------|------------------------------------------------------------------------------------------------------------------------------------------------------------------------------------------------------------------------------------------------------------------------------------------------------------------------------------------------------------------------------------------------------------------------------------------------------------------------------------------------------------------------------------------------------------------------------------------------------------------------------------------------------------------------------------------------------------------------------------------------------------------------------------------------------------------------------------------------------------------------------------------------------------------------------|
|                                               | <p>Ultrasound dactylitis (contiguous inflammation, power doppler) – Tools are in development</p>                                                                                                                                                                                                                                                                                                                                                                                                                                                                                                                                                                                                                                                                                                                                                                                                                             |
| <p><b>MSK disease activity/Enthesitis</b></p> | <p><b><u>Physician assessed with patient input (tenderness)</u></b><br/> Leeds Enthesitis Index (LEI) – tenderness at 6 sites (score 0-6, Lateral epicondyles, Medial femoral condyles, Achilles tendons)<br/> Spondyloarthritis Research Consortium of Canada Index (SPARCC) – tenderness at 18 sites (score 0-16, tbc)<br/> Maastricht Ankylosing Spondylitis Enthesis Score (MASES) – tenderness at 13 sites (score 0-13, tbc)<br/> Modified MASES – tenderness at 15 sites (score 0-15, tbc)<br/> Impact Index – tenderness at 4 sites (score 0-4, Achilles tendons, Plantar Fascias)</p> <p><b><u>Enthesitis assessment using ultrasound</u></b><br/> MAdrid Sonographic Enthesitis Index (MASEI)<br/> Glasgow Ultrasound Enthesitis Scoring System (GUESS)<br/> Ultrasound entheses (thickening, calcification, fluid, erosion, PD)- Tools are in development</p>                                                      |
| <p><b>MSK disease activity/Spine</b></p>      | <p><b><u>PROMs</u></b><br/> Bath Ankylosing Spondylitis Disease Activity Index (BASDAI)<br/> Bath Ankylosing Spondylitis Patient Global Score (BAS-G)</p> <p><b><u>Physician performed using a measuring tape (anthropometric measurements)</u></b><br/> Spinal mobility cervical: cervical rotation<br/> Spinal mobility cervical: occiput to wall<br/> Spinal mobility cervical: tragus to wall<br/> Spinal mobility thoracic: chest expansion<br/> Spinal mobility lumbar: modified Schober<br/> Spinal mobility lumbar: right and left lateral lumbar flexion<br/> Hip joint range of motion: intermalleolar distance<br/> BASMI index (multiple measurements, gives a final score)</p> <p><b><u>The patient undergoes an MRI of the pelvis. A trained musculoskeletal radiologist performs the score by looking at the MRI images</u></b><br/> ASAS/OMERACT MRI definition for sacroiliitis (MRI pelvis, SI joints)</p> |

| <b>Skin disease activity: presence of disease (signs and) symptoms skin and nails</b>                            |                                                                                                                                                                                                                                                                                                                                                                                                                                                                                                                                                                                                                                                        |
|------------------------------------------------------------------------------------------------------------------|--------------------------------------------------------------------------------------------------------------------------------------------------------------------------------------------------------------------------------------------------------------------------------------------------------------------------------------------------------------------------------------------------------------------------------------------------------------------------------------------------------------------------------------------------------------------------------------------------------------------------------------------------------|
| <b>Skin disease activity/Skin</b>                                                                                | <p><b><u>Physician performed by inspection of (looking at) the patient's skin</u></b></p> <p>Psoriasis Area and Severity Index (PASI)<br/> Psoriasis Body Surface Area (BSA)<br/> Target psoriatic skin lesion score (0-12, 12 worst)<br/> Physician global assesment of psoriasis (0 clear to 5 severe) (PSGA/PGA)<br/> Mean Body Surface Area</p> <p><b><u>PROMs</u></b></p> <p>Psoriasis Symptom Inventory (PSI)<br/> Psoriasis Symptom Diary (PSD)<br/> Worst Itch VAS<br/> Itch Severity Index (no to worst possible itch) VAS<br/> Patient Assessment Skin Status (Likert)<br/> PsAID NRS 3 Skin problems (1 week recall)<br/> PASI (SAPASI)</p> |
| <b>Skin disease activity/Nail</b>                                                                                | <p><b><u>Physician performed by inspection of (looking at) the patient's nails</u></b></p> <p>Nail Psoriasis Severity Index (NAPSI) (0-80 finger nails only; or 0-160 finger and toe nails)<br/> Modified Nail Psoriasis Severity Index (mNAPSI) (0-130)<br/> Target NAPSI score (0-13)<br/> Physician global assesment of nail disease (VAS Nail Psoriasis)<br/> Psoriasis Nail Severity Score (PNSS, range 0-80)<br/> Bath Nail Score (0-40, scores finger nails for pitting, onycholysis, hyperkeratoss, dystrophy)</p>                                                                                                                             |
| <b>Pain: experiencing an unpleasant physical sensation that aches, hurts in one or more joints, or the spine</b> |                                                                                                                                                                                                                                                                                                                                                                                                                                                                                                                                                                                                                                                        |
|                                                                                                                  | <p><b><u>PROMs</u></b></p> <p>VAS Pain (now)<br/> VAS Pain (1 week recall)<br/> VAS Pain (recall not specified)<br/> NRS Pain (now)<br/> NRS Pain (1 week recall)<br/> PsAID NRS #1 Pain (1 week recall)<br/> Arthritis Impact Measurement Scales (AIMS1) Pain</p>                                                                                                                                                                                                                                                                                                                                                                                     |

|                                                                                                                           |                                                                                                                                                                                                                                                                                                                                                                                                                                                                                                                                     |
|---------------------------------------------------------------------------------------------------------------------------|-------------------------------------------------------------------------------------------------------------------------------------------------------------------------------------------------------------------------------------------------------------------------------------------------------------------------------------------------------------------------------------------------------------------------------------------------------------------------------------------------------------------------------------|
|                                                                                                                           | Arthritis Impact Measurement Scales (AIMS2) Pain<br>SF-36 Bodily Pain<br>PROMIS Pain Intensity short form (SF)<br>PROMIS Pain Interference SF                                                                                                                                                                                                                                                                                                                                                                                       |
| <b>Patient Global: patient-reported disease-related health status</b>                                                     |                                                                                                                                                                                                                                                                                                                                                                                                                                                                                                                                     |
|                                                                                                                           | <u><b>PROMs:</b></u><br><u>Patient global due to PsA (PsA Psoriasis and Arthritis/MSK global)</u><br>VAS (today)<br>NRS (today)<br>NRS (1 week recall)<br>VAS (1 week recall)<br>VAS (recall not specified)<br><br><u>Patient global due to psoriasis (PsA Psoriasis global)</u><br>VAS (today)<br>NRS (today)<br>NRS (1 week recall)<br>VAS (1 week recall)<br><br><u>Patient global due to arthritis (PsA Arthritis global)</u><br>VAS (today)<br>NRS (today)<br>NRS (1 week recall)<br>NRS (1 day recall)<br>VAS (1 week recall) |
| <b>Physical Function: being able to perform physical activities (includes upper/lower extremity functioning, balance)</b> |                                                                                                                                                                                                                                                                                                                                                                                                                                                                                                                                     |
|                                                                                                                           | <u><b>PROMs assessing activities</b></u><br>Health Assessment Questionnaire Disability Index (HAQ-DI)<br>Modified Health Assessment Questionnaire (mHAQ)<br>SF-36 Physical Function<br>SF-36 Physical Component Score<br>SF-12 Physical Health Component Score<br>PROMIS Physical Function SF<br>AIMS2 Mobility<br>AIMS2 Physical<br>AIMS2 Dexterity<br>AIMS2 Arm Function<br>PsAID NRS #5 Functional capacity (1 week recall)                                                                                                      |

|                                                                                                 |                                                                                                                                                                                                                                                                                                                                                                                     |
|-------------------------------------------------------------------------------------------------|-------------------------------------------------------------------------------------------------------------------------------------------------------------------------------------------------------------------------------------------------------------------------------------------------------------------------------------------------------------------------------------|
|                                                                                                 | <p><b><u>PROMs assessing spine function</u></b><br/>Bath Ankylosing Spondylitis Functional Index</p> <p><b><u>Physician's impression of the patient's functional level as it related to ADLs/IADLs</u></b><br/>ACR functional class (4 categories from fully functional to fully dependent)</p>                                                                                     |
| <b>HRQoL/Life Impact: aspects of physical, emotional, and social life are included in HRQoL</b> |                                                                                                                                                                                                                                                                                                                                                                                     |
| HRQoL                                                                                           | <p><b><u>PROMs</u></b><br/>SF-36 MCS<br/>SF-36 PCS<br/>Psoriatic Arthritis Quality of Life (PsAQoL)<br/>PsAID9<br/>PSAID12<br/>VITACORA19-Spanish only<br/>Dermatology Life Quality Index (DLQI)<br/>Ankylosing spondylitis quality of life (ASQoL)<br/>Euro-Quality of Life (Euro-QoL, multiple: 5D, 3L, 5L)<br/>Psoriasis index of quality of Life (PSORIQoL)</p>                 |
| <b>Fatigue: experiencing fatigue, tiredness, lack of energy, feeling worn out, or exhausted</b> |                                                                                                                                                                                                                                                                                                                                                                                     |
|                                                                                                 | <p><b><u>PROMs</u></b><br/>Functional Assessment of Chronic Illness Therapy (FACIT)-Fatigue<br/>SF-36 Vitality<br/>PROMIS Fatigue SF<br/>VAS Fatigue<br/>NRS Fatigue<br/>PsAID NRS #2 Fatigue (1 week recall)<br/>Fatigue Severity Score (FSS)<br/>Fatigue Assessment Scale (FAS)<br/>Bristol RA Fatigue (BRAf) (3 NRS scales)<br/>Multidimensional Assessment of Fatigue (MAF)</p> |
| <b>Systemic inflammation: blood tests such as the acute phase reactants ESR and/or CRP</b>      |                                                                                                                                                                                                                                                                                                                                                                                     |
|                                                                                                 | <p><b><u>Laboratory assays from a patient's blood/serum</u></b><br/>C-Reactive Protein (CRP)<br/>Erythrocyte Sedimentation Rate (ESR)</p>                                                                                                                                                                                                                                           |
| <b>MIDDLE CIRCLE</b>                                                                            |                                                                                                                                                                                                                                                                                                                                                                                     |

| <b>Structural damage: joint deformity, damage, instability to one or more joints or the spine</b>  |                                                                                                                                                                                                                                                                                                                                                                                                                                                                                                                                                 |
|----------------------------------------------------------------------------------------------------|-------------------------------------------------------------------------------------------------------------------------------------------------------------------------------------------------------------------------------------------------------------------------------------------------------------------------------------------------------------------------------------------------------------------------------------------------------------------------------------------------------------------------------------------------|
| Structural damage/Peripheral joints                                                                | <b><u>Physician assessed</u></b><br>Damaged/Deformed Joint Count                                                                                                                                                                                                                                                                                                                                                                                                                                                                                |
| Radiographic Damage/ Peripheral joints                                                             | <b><u>The patient undergoes an XRay of the hands and feet. A trained musculoskeletal radiologist or rheumatologist performs the score by looking at the XRay images.</u></b><br>Reductive X-ray Score for Psoriatic Arthritis (ReXSPA)<br>PsA Modified van der Heijde-Sharp (vdH-S) Score<br>Modified Steinbrocker Scoring Method<br>PsA Ratingen Score (PARS)<br>Radiographic Erosion or Osteolysis (Y/N)<br>Radiographic score that includes juxtaarticular new bone formation                                                                |
| Radiographic Damage/ Spine                                                                         | <b><u>The patient undergoes an XRay of the spine. A trained musculoskeletal radiologist or rheumatologist performs the score by looking at the XRay images</u></b><br>Psoriatic Arthritis Spondylitis Radiology Index (PASRI)<br>Bath Ankylosing Spondylitis Radiology Index (BASRI) -Spine<br>Bath Ankylosing Spondylitis Radiology Index (BASRI) -Hip<br>Bath Ankylosing Spondylitis Radiology Index (BASRI) -Total<br>Modified Stoke Ankylosing Spondylitis Spine Score (mSASSS)<br>Radiographic Ankylosing Spondylitis Spinal Score (RASSS) |
| MRI damage/Peripheral joints (also assesses activity, see MSK disease activity/Arthritis)          | <b><u>The patient undergoes an MRI of the hands and feet. A trained musculoskeletal radiologist performs the score by looking at the MRI images.</u></b><br>OMERACT PsA Magnetic Resonance Imaging Scoring (PsAMRIS): assesses <b>hands and feet</b> joints synovitis, bone marrow edema, and bone erosion + tenosynovitis, periarticular inflammation, and bone proliferation                                                                                                                                                                  |
| <b>Participation: includes family roles, social activities, leisure activities, and employment</b> |                                                                                                                                                                                                                                                                                                                                                                                                                                                                                                                                                 |
|                                                                                                    | <b><u>PROMs</u></b><br>Social Role Participation Questionnaire (SRPQ)<br>SF-36 Role-Emotional<br>SF-36 Role-Physical<br>PROMIS Ability to Participate Social SF<br>Work Productivity Survey (WPS)<br>Impact of PsA on Work Productivity (VAS)                                                                                                                                                                                                                                                                                                   |

|                                                                                                                                                  |                                                                                                                                                                                                                                                                                        |
|--------------------------------------------------------------------------------------------------------------------------------------------------|----------------------------------------------------------------------------------------------------------------------------------------------------------------------------------------------------------------------------------------------------------------------------------------|
|                                                                                                                                                  | Work Limitations Questionnaire (WLQ)<br>Work Productivity and Activity Impairment (WPAI -SHP)<br>PsAID NRS #4 Work and/or leisure activities (1 week recall)<br>PsAID NRS #11 Social Participation (1 week recall)                                                                     |
| <b>Emotional well-being: captures depressive mood, anxiety, embarrassment, self-worth, frustration, and stress</b>                               |                                                                                                                                                                                                                                                                                        |
| Emotional well-being/Mental health                                                                                                               | <b><u>PROMs</u></b><br>SF-36 Emotional well-being<br>SF-36 Mental Health Component<br>SF-12 Mental Health Component<br>PsAID NRS #9 Anxiety, fear, uncertainty (1 week recall)<br>PsAID NRS #10 Embarrassment and/or shame (1 week recall)<br>PsAID NRS #12 Depression (1 week recall) |
| Anxiety                                                                                                                                          | <b><u>PROMs</u></b><br>Hospital Anxiety and Depression Scale (HADS) Anxiety<br>PROMIS Emotional Distress – Anxiety SF                                                                                                                                                                  |
| Depression                                                                                                                                       | <b><u>PROMs</u></b><br>HADS Depression<br>PHQ9<br>PROMIS Emotional Distress - Depression SF                                                                                                                                                                                            |
| <b>Economic cost: reflects resource use/economic impact of disease</b>                                                                           |                                                                                                                                                                                                                                                                                        |
|                                                                                                                                                  | EQ-5D (3 level and 5 level)<br>SF-6D<br>Willingness to pay questionnaire (WTP)                                                                                                                                                                                                         |
| <b>RESEARCH AGENDA</b>                                                                                                                           |                                                                                                                                                                                                                                                                                        |
| <b>Stiffness: experiencing resistance or rigidity in one or more joints, tendons, or the spine that prevents smooth and full range of motion</b> |                                                                                                                                                                                                                                                                                        |
|                                                                                                                                                  | <b><u>PROMs</u></b><br>NRS Stiffness<br>VAS Stiffness                                                                                                                                                                                                                                  |
| <b>Sleep (quality): being able to have a restful sleep</b>                                                                                       |                                                                                                                                                                                                                                                                                        |
|                                                                                                                                                  | VAS Sleep<br>PsAID NRS #7 Sleep (1 week recall)<br>PROMIS Sleep Disturbance SF                                                                                                                                                                                                         |
| <b>Independence: being able to maintain one's independence, not being dependent on others for help</b>                                           |                                                                                                                                                                                                                                                                                        |

|                                                                                                                                |  |
|--------------------------------------------------------------------------------------------------------------------------------|--|
|                                                                                                                                |  |
| <b>Treatment burden: impact of treatment and monitoring of disease or treatment (for example financial or time commitment)</b> |  |
|                                                                                                                                |  |

Grey type designates instruments that cannot be used in their current form because they are either in development, do not have a corresponding English version, or are incompletely described in the publication. PsA: psoriatic arthritis; MSK: musculoskeletal; SJC/TJC: swollen/tender joint count; PROMIS: Patient Reported Outcomes Measurement Information System; BASMI: Bath Ankylosing Spondylitis Metrology Index; ASAS: Assessment of SpondyloArthritis international Society; SI: sacroiliac; PGA: Patient Global Assessment; VAS: Visual Analogue Scale; PsAID: Psoriatic Arthritis Impact of Disease; NRS: numeric rating scale; PROMIS: Patient Reported Outcomes Measurement Information System; ADL: Activities of Daily Living; IADL: Instrumental Activities of Daily Living; ACR: American College of Rheumatology; HRQoL: health-related quality of life; RA: Rheumatoid Arthritis; PHQ: Patient Health Questionnaire.

#### Sources:

1. Kalyoncu U, Ogdie A, Campbell W, Bingham CO, 3rd, de Wit M, Gladman DD, et al. Systematic literature review of domains assessed in psoriatic arthritis to inform the update of the psoriatic arthritis core domain set. *RMD Open* 2016;2:e000217
2. Mease PJ. Measures of psoriatic arthritis: Tender and Swollen Joint Assessment, Psoriasis Area and Severity Index (PASI), Nail Psoriasis Severity Index (NAPSI), Modified Nail Psoriasis Severity Index (mNAPSI), Mander/Newcastle Enthesitis Index (MEI), Leeds Enthesitis Index (LEI), Spondyloarthritis Research Consortium of Canada (SPARCC), Maastricht Ankylosing Spondylitis Enthesis Score (MASES), Leeds Dactylitis Index (LDI), Patient Global for Psoriatic Arthritis, Dermatology Life Quality Index (DLQI), Psoriatic Arthritis Quality of Life (PsAQOL), Functional Assessment of Chronic Illness Therapy-Fatigue (FACIT-F), Psoriatic Arthritis Response Criteria (PsARC), Psoriatic Arthritis Joint Activity Index (PsAJAI), Disease Activity in Psoriatic Arthritis (DAPSA), and Composite Psoriatic Disease Activity Index (CPDAI). *Arthritis Care Res* 2011;63 Suppl 11:S64-85.
3. Hojgaard P, Klokke L, Orbai AM, Holmsted K, Bartels EM, Leung YY, et al. A systematic review of measurement properties of patient reported outcome measures in psoriatic arthritis: A GRAPPA-OMERACT initiative. *Semin Arthritis Rheum* 2017 Sep 9 (E-pub ahead of print).



Online supplement for Content and Face Validity and Feasibility of 5 Candidate Instruments for Psoriatic Arthritis Randomized Controlled Trials: The PsA OMERACT Core Set Workshop at the GRAPPA 2017 Annual Meeting, *The Journal of Rheumatology* Supplement 94, doi:10.3899/jrheum.180142

4. Orbai AM, Ogdie A. Patient-Reported Outcomes in Psoriatic Arthritis. *Rheum Dis Clin North Am* 2016;42:265-83.
5. Palominos PE, Gaujoux-Viala C, Fautrel B, Dougados M, Gossec L. Clinical outcomes in psoriatic arthritis: A systematic literature review. *Arthritis Care Res* 2012;64:397-406.
